# Supplementary material for: Macrophage mannose receptor, CD206, predict prognosis in patients with pulmonary tuberculosis
Source: PubMed Central journal article supplement (PMC6120933; doi:10.1038/s41598-018-31565-5), 2018-09-03
Supplement: 41598_2018_31565_MOESM1_ESM.pdf [file 41598_2018_31565_MOESM1_ESM.pdf]

1 **Macrophage mannose receptor, CD206, predict prognosis in patients with pulmonary tuberculosis**

2

3 Yuzo Suzuki, M.D., Ph.D.<sup>1</sup>, Masahiro Shirai, M.D., Ph.D.<sup>2</sup>, Kazuhiro Asada, M.D., Ph.D.<sup>3</sup>, Hideki Yasui, M.D., Ph.D.<sup>1</sup>, Masato Karayama,  
4 M.D., Ph.D.<sup>1</sup>, Hironao Hozumi, M.D., Ph.D.<sup>1</sup>, Kazuki Furuhashi, M.D., Ph.D.<sup>1</sup>, Noriyuki Enomoto, M.D., Ph.D.<sup>1</sup>, Tomoyuki Fujisawa, M.D.,  
5 Ph.D.<sup>1</sup>, Yutaro Nakamura, M.D., Ph.D.<sup>1</sup>, Naoki Inui, M.D., Ph.D.<sup>1</sup>, Toshihiro Shirai, M.D., Ph.D.<sup>3</sup>, Hiroshi Hayakawa, M.D., Ph.D.<sup>2</sup>, Takafumi  
6 Suda, M.D., Ph.D.<sup>1</sup>

7

8 <sup>1</sup>Second Division, Department of Internal Medicine, Hamamatsu University School of Medicine, Hamamatsu, Japan

9 <sup>2</sup>Respiratory Medicine, Tenryu Hospital, National Hospital Organization, Hamamatsu, Japan

10 <sup>3</sup>Respiratory Medicine, Shizuoka General Hospital, Shizuoka, Japan

11 **Corresponding author:** Yuzo Suzuki, M.D., Ph.D.

12 **Supplemental Table 1. Clinical characteristics of patients with pulmonary tuberculosis according to the mortality**

|                                   | Tenryu Cohort (n=96) |                         |                 | Shizuoka Cohort (n=112) |                         |                 |
|-----------------------------------|----------------------|-------------------------|-----------------|-------------------------|-------------------------|-----------------|
|                                   | suivivors<br>(n=74)  | non-survivors<br>(n=22) | <i>p</i> -value | suivivors<br>(n=86)     | non-survivors<br>(n=26) | <i>p</i> -value |
| Sex, M/F                          | 50 / 24              | 12 / 10                 | 0.313           | 56 / 30                 | 15 / 11                 | 0.496           |
| Age, yr                           | 69.2±23.2            | 83.1±8.2                | 0.034           | 68.5±20.0*              | 82.5±13.6               | <0.001          |
| Body mass index                   | 19.6±3.2             | 17.2±3.6                | 0.021           | 19.3±3.4                | 17.3±2.9                | 0.043           |
| Current smoker                    | 1 (4.6%)             | 13 (17.6%)              | 0.178           | 15 (17.4%)              | 2 (7.7%)                | 0.351           |
| <b>System involved</b>            |                      |                         |                 |                         |                         |                 |
| Pulmonary tuberculosis only       | 43 (58.1%)           | 10 (45.5%)              | 0.335           | 65 (75.6%)              | 16 (61.5%)              | 0.211           |
| Tuberculous pleurisy              | 27 (36.5%)           | 10 (45.5%)              | 0.465           | 16 (18.6%)              | 9 (34.6%)               | 0.108           |
| Disseminated tuberculosis         | 7 (9.5%)             | 5 (22.7%)               | 0.138           | 5 (5.8%)                | 4 (15.4%)               | 0.209           |
| Osteoarticular tuberculosis       | 2 (2.9%)             | 1 (3.9%)                | 1.000           | 3 (3.5%)                | 1 (3.9%)                | 1.000           |
| Bronchial tuberculosis            | 0 (0%)               | 0 (0%)                  | -               | 4 (4.7%)                | 0 (0%)                  | 0.572           |
| Tuberculous colitis               | 2 (2.9%)             | 0 (0%)                  | 1.000           | 0 (0%)                  | 1 (3.9%)                | 0.232           |
| <b>Radiographic findings</b>      |                      |                         |                 |                         |                         |                 |
| Cavity                            | 14 (18.9%)           | 12 (54.6%)              | 0.002           | 51 (59.3%)              | 12 (46.2%)              | 0.265           |
| <b>Microbiological findings</b>   |                      |                         |                 |                         |                         |                 |
| Suputum smear (0, 1+, 2+, 3+, 4+) | 7, 37, 14, 13, 3     | 1, 10, 1, 3, 7          | 0.004           | 1, 32, 18, 29, 6        | 1, 12, 3, 7, 3          | 0.565           |
| MDR-TB, no. (%)                   | 1 (1.35%)            | 0 (0%)                  | 1.000           | 2 (2.3%)                | 0 (0%)                  | 1.000           |
| <b>Comorbidity, no. (%)</b>       |                      |                         |                 |                         |                         |                 |
| Congestive heart failure          | 9 (12.2%)            | 5 (22.7%)               | 0.2996          | 9 (10.8%)               | 11 (42.3%)              | <0.001          |
| Chronic pulmonary disease         | 7 (9.46%)            | 6 (27.3%)               | 0.0685          | 18 (20.9%)              | 2 (7.7%)                | 0.152           |

|                                                       |                     |                     |        |                     |                     |        |
|-------------------------------------------------------|---------------------|---------------------|--------|---------------------|---------------------|--------|
| Renal disease                                         | 2 (2.7%)            | 4 (18.2%)           | 0.024  | 2 (2.3%)            | 2 (7.7%)            | 0.230  |
| Diabetes mellitus                                     | 9 (12.2%)           | 4 (18.2%)           | 0.487  | 16 (18.6%)          | 4 (15.4%)           | 1.000  |
| Liver disease                                         | 2 (2.7%)            | 1 (4.6%)            | 0.546  | 1 (1.16%)           | 2 (7.7%)            | 0.134  |
| Cerebrovascular disease                               | 15 (20.3%)          | 7 (31.8%)           | 0.262  | 14 (16.3%)          | 6 (23.1%)           | 0.559  |
| Neoplasm                                              | 5 (6.8%)            | 4 (18.2%)           | 0.204  | 3 (3.5%)            | 6 (23.1%)           | 0.005  |
| Chronic corticosteroid treatment                      | 4 (5.4%)            | 3 (13.6%)           | 0.195  | 3 (3.5%)            | 2 (7.7%)            | 0.329  |
| <b>Clinical characteristics on admission</b>          |                     |                     |        |                     |                     |        |
| Body temperature, °C                                  | 36.9±0.5            | 37.0±1.0            | 0.798  | 36.8±0.7            | 37.0±1.2            | 0.117  |
| Heart rate, rate/min                                  | 83.0±15.1           | 86.4±16.9           | 0.567  | 85.3±15.9           | 88.4±15.6           | 0.341  |
| Respiratory rate, breaths /min                        |                     |                     |        |                     |                     |        |
| Respiratory failure (SaO <sub>2</sub> < 90%), no. (%) | 10 (13.5%)          | 12 (54.6%)          | <0.001 | 6(7.0%)             | 11(42.3%)           | <0.001 |
| Impaired consciousness, no. (%)                       | 1 (1.35%)           | 4 (18.2%)           | 0.009  | 0 (0%)              | 4 (15.4%)           | 0.002  |
| <b>Laboratory findings</b>                            |                     |                     |        |                     |                     |        |
| BUN, (8.6-21.6 mg/dl) ***                             | 18.4±13.3           | 21.5±12.4           | 0.238  | 16.1±7.7            | 22.7±15.6           | 0.078  |
| TP, (6.7-8.1g/dl)                                     | 7.0±0.8             | 6.0±1.1             | <0.001 | 7.4±0.8             | 6.1±0.9             | <0.001 |
| Alb, (3.9-4.9 mg/dl)                                  | 3.3±0.8             | 2.4±0.6             | <0.001 | 3.2±0.8             | 2.3±0.5             | <0.001 |
| Cre, (0.70-1.17 mg/dl)                                | 0.76±0.35           | 0.92±0.69           | 0.516  | 0.86±0.76           | 0.90±0.64           | 0.926  |
| WBC, (3600-9200 /mm <sup>3</sup> )                    | 6655±2153           | 8100±4402           | 0.268  | 8076±3925           | 7569±3187           | 0.743  |
| ESR, (2-10 mm/H)                                      | 63.6±32.7<br>(n=63) | 68.1±37.3<br>(n=21) | 0.545  | 46.5±28.2<br>(n=85) | 37.8±34.3<br>(n=26) | 0.076  |
| CRP, (≤0.10 mg/dl)                                    | 4.0±3.8             | 9.3±5.5             | <0.001 | 4.5±5.5             | 9.6±6.7             | <0.001 |
| SAA, (≤10 µg/ml)                                      | 333±372<br>(n=65)   | 541±466<br>(n=19)   | 0.065  | 345±537<br>(n=85)   | 615±783<br>(n=26)   | 0.007  |

13 **Supplement Table 2. Correlation between the serum soluble CD206 and clinical parameters in patients with pulmonary tuberculosis**

|                                    | Serum sCD206 Tenryu cohort |        | Serum sCD206 Shizuoka cohort |        |
|------------------------------------|----------------------------|--------|------------------------------|--------|
|                                    | R                          | p      | R                            | p      |
| Age                                | 0.367                      | 0.003  | 0.240                        | 0.013  |
| Body mass index, Kg/m <sup>2</sup> | -0.355                     | 0.004  | -0.267                       | 0.005  |
| P/F ratio, mmHg                    | -0.398                     | 0.001  | -0.588                       | <0.001 |
| TP, g/dl                           | -0.547                     | <0.001 | -0.480                       | <0.001 |
| Alb, g/dl                          | -0.557                     | <0.001 | -0.620                       | <0.001 |
| BUN, mg/dl                         | 0.179                      | 0.161  | 0.242                        | 0.012  |
| Cre, mg/d                          | 0.105                      | 0.415  | 0.060                        | 0.541  |
| LDH, IU/l                          | 0.430                      | <0.001 | 0.639                        | <0.001 |
| CRP, mg/dl                         | 0.457                      | <0.001 | 0.520                        | <0.001 |
| SAA, mg/dl                         | 0.332                      | <0.001 | 0.402                        | <0.001 |
| Serum sCD206 ng/ml                 | 0.684                      | <0.001 | 0.470                        | <0.001 |
| WBC, / $\mu$ l                     | 0.032                      | 0.804  | 0.108                        | 0.267  |
| HB, g/dl                           | -0.415                     | <0.001 | -0.305                       | 0.001  |
| Plt, x 10 <sup>4</sup> / $\mu$ l   | -0.280                     | 0.027  | -0.289                       | 0.003  |

14 P/F ratio, ratio of partial pressure arterial oxygen and fraction of inspired oxygen (PaO<sub>2</sub>/FiO<sub>2</sub>); TP, total protein; Alb, albumin; BUN, blood urea  
15 nitrogen; Cre, creatinine; LDH, lactate dehydrogenase; CRP, C-reactive protein; SAA, serum amyloid A; PCT, procalcitonin; WBC, white blood  
16 cell count; HB, hemoglobin; Ht, hematocrit; Plt, platelets.

17 *Supplement Table 3. Characteristics of Pleural fluid with 100 patients*

|                | TB pleurisy   |
|----------------|---------------|
| No of patients | 29            |
| Sex, M/F       | 19 / 10       |
| Age            | 79.5±11.7     |
| TP (mg/dl)     | 4.3 ± 1.3     |
| Glu (mg/dl)    | 118.2 ± 60.4  |
| LDH (U/l)      | 484.9 ± 333.8 |
| ADA (U/l)      | 84.3 ± 52.7   |

18 TB; tuberculosis, TP; total protein, Glu; glucose, LDH; lactate dehydrogenase, ADA; adenosine deaminase activity

19

20 *Supplement Table 4. Diagnostic value of serum soluble CD206 predicts mortality of pulmonary tuberculous patients*

21

| Predictor      | Sensitivity (%) | Specificity (%) | Likelihood | Sensitivity (%) | Specificity (%) | Likelihood | Sensitivity (%) | Specificity (%) | Likelihood |
|----------------|-----------------|-----------------|------------|-----------------|-----------------|------------|-----------------|-----------------|------------|
| sCD206 (ng/ml) | Tenryu cohort   |                 |            | Shizuoka cohort |                 |            | Combined cohort |                 |            |
| 1,000          | 81.8            | 66.2            | 2.42       | 92.3            | 61.6            | 2.41       | 87.5            | 63.8            | 2.41       |
| 1,400          | 77.3            | 82.4            | 4.40       | 84.6            | 75.6            | 3.47       | 81.3            | 78.8            | 3.82       |
| 1,500          | 77.3            | 85.1            | 5.20       | 80.8            | 79.1            | 3.86       | 79.2            | 81.3            | 4.22       |
| 1,600          | 77.3            | 86.5            | 5.72       | 76.9            | 81.4            | 4.14       | 79.2            | 83.8            | 4.87       |
| 1,800          | 68.2            | 89.2            | 6.31       | 73.1            | 86.1            | 5.24       | 70.8            | 87.5            | 5.67       |
| 2,000          | 54.6            | 90.5            | 5.77       | 61.5            | 87.2            | 4.81       | 60.4            | 88.8            | 5.37       |

22

23 *Supplement Table 5. The AUCs of predicting mortality in patients with pulmonary tuberculosis*

24

| sCD206 (ng/ml) | Tenryu cohort |               | Shizuoka cohort |             | Combined |             |
|----------------|---------------|---------------|-----------------|-------------|----------|-------------|
|                | AUC           | 95% CI        | AUC             | 95% CI      | AUC      | 95% CI      |
| CD206, ng/ml   | 0.847         | (0.756-0.939) | 0.874           | 0.800-0.946 | 0.860    | 0.801-0.918 |
| CRP, mg/dl     | 0.784         | 0.670-0.899   | 0.757           | 0.658-0.858 | 0.768    | 0.693-0.842 |
| SAA, µg/ml     | 0.640         | 0.501-0.778   | 0.675           | 0.564-0.785 | 0.657    | 0.570-0.744 |

25
